# Supplementary material
Source: publisher figshare collection journal article supplement (https://rs.figshare.com/ndownloader/files/25892638)
Supplement: Supplementary file 1 [file 25892638]

# Supplementary Figures for “Models of benthic bipedalism”

Fabio Giardina<sup>1</sup>, and L. Mahadevan<sup>1,2</sup>

<sup>1</sup>*School of Engineering and Applied Sciences, Harvard University, Cambridge, Massachusetts 02138, USA*

<sup>2</sup>*Department of Physics, Department of Organismic and Evolutionary Biology, Harvard University, Cambridge, Massachusetts 02138, USA*

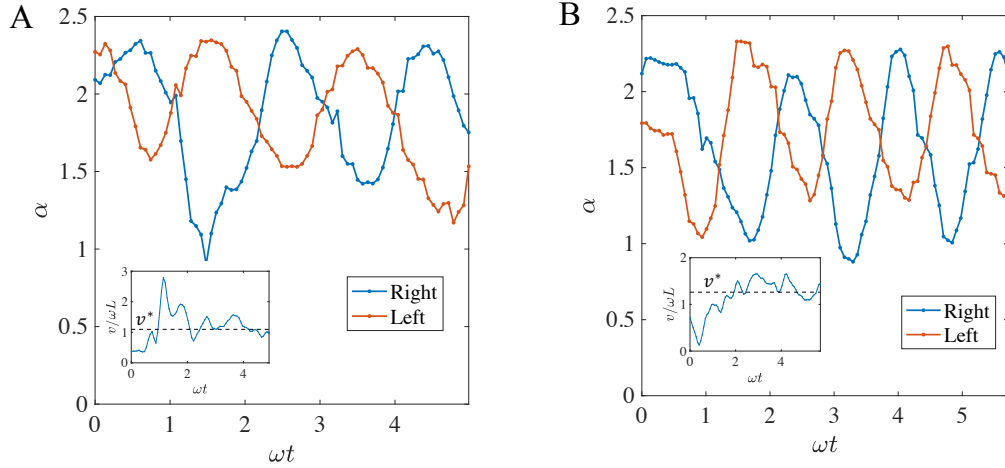

FIG. S1: **Locomotion kinematics of little skate A and B.** These data are different specimen and runs from Fig. 1D. Left and right leg angles  $\alpha$  as a function of dimensionless time and mean foot placement angle  $\alpha_0$ . The inset shows the dimensionless speed of the pelvic girdle as a function of dimensionless time with  $v^*$  (dashed line) the approximate lower speed bound during steady state locomotion. Note that individuals A and B are different from the one corresponding to data in 1D.

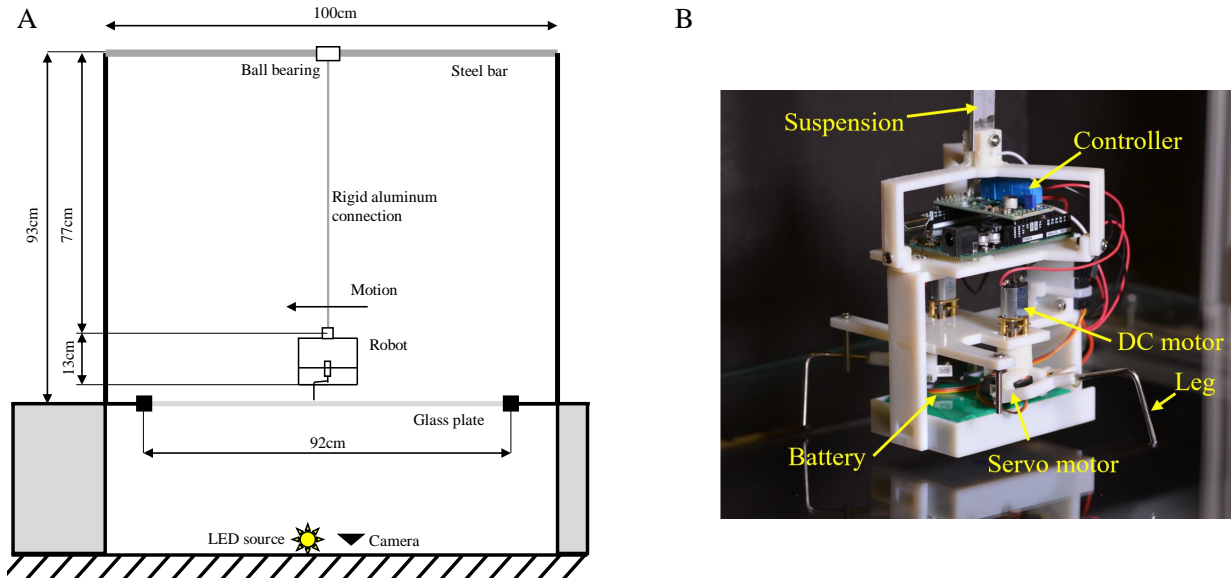

FIG. S2: **Sketch of experiment set-up (not to scale) and robot.** **A.** Robot is walking on a glass plate and filmed with a camera from below. A rigid aluminum beam supports the robot against gravity. The beam is connected via a ball bearing to a steel rod along which it can slide freely. **B** Robot walking on glass plate and its components.

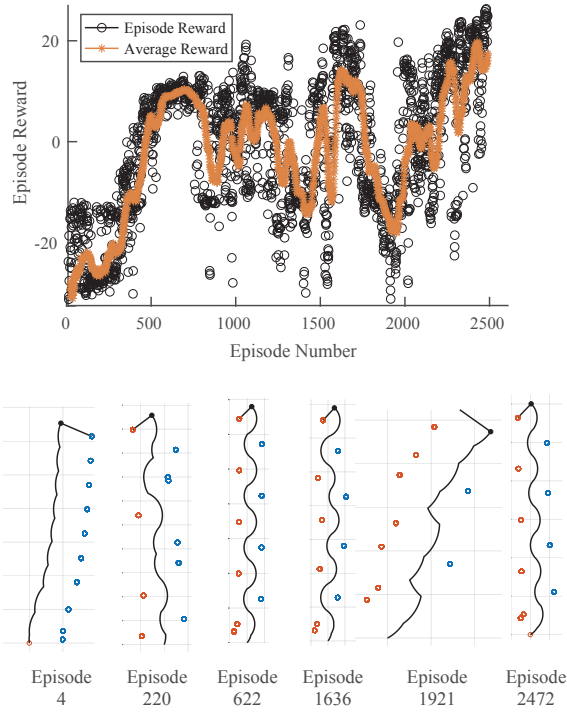

FIG. S3: **Sample learning progress.** Training progress of DDPG agent for the little skate model with inset showing center of mass trajectories and footfalls at different episodes during learning.

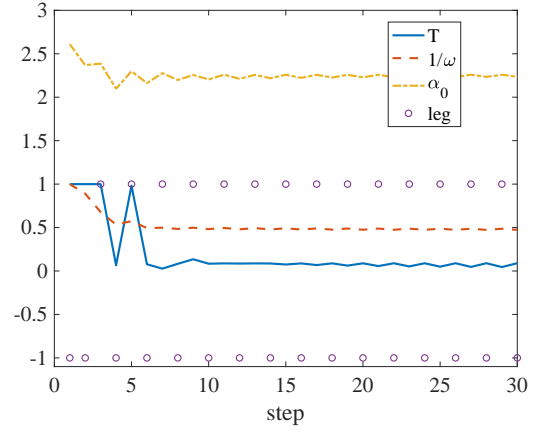

FIG. S4: **Control parameters of learned solution.** Control parameters of best episode learned from the DDPG agent as a function of step number. This solution corresponds to RL path shown in Fig.3.
